# Supplementary material for: Discretionary foods have notable environmental and expenditure relevance regardless of preference for meat or plant-based protein sources
Source: Research Square preprint supplement (doi:10.21203/rs.3.rs-6463928/v1), 2025-04-18
Supplement: Supplementary file 1 [file 79a3a812d382c53dd487123c.docx]

**Supplementary Description 1.** We double checked the selected products from the Agribalyse database with other data bases which have previously been collated for Finnish food systems. Food products for which the farming practices and meat source in Finland differs most from France (e.g., beef and sheep), we identified products which more closely align with previous datasets made for Finland (e.g., Hietala et al. <https://doi.org/10.1016/j.agsy.2021.103250>). Typically, 80% of beef products consumed in Finland are from dairy cattle, resulting in a lower environmental footprint than beef from beef cattle, superficially.

Despite the broader scope of environmental impacts considered by Agribalyse 3.0, we chose to concentrate on a set of indicators (land use, consumptive water use, freshwater eutrophication, marine eutrophication) due to their significance in terms of overall environmental impact and their ability to encapsulate key information about the overall impacts—see also indicators of comparison in Mazac et al. (2024).


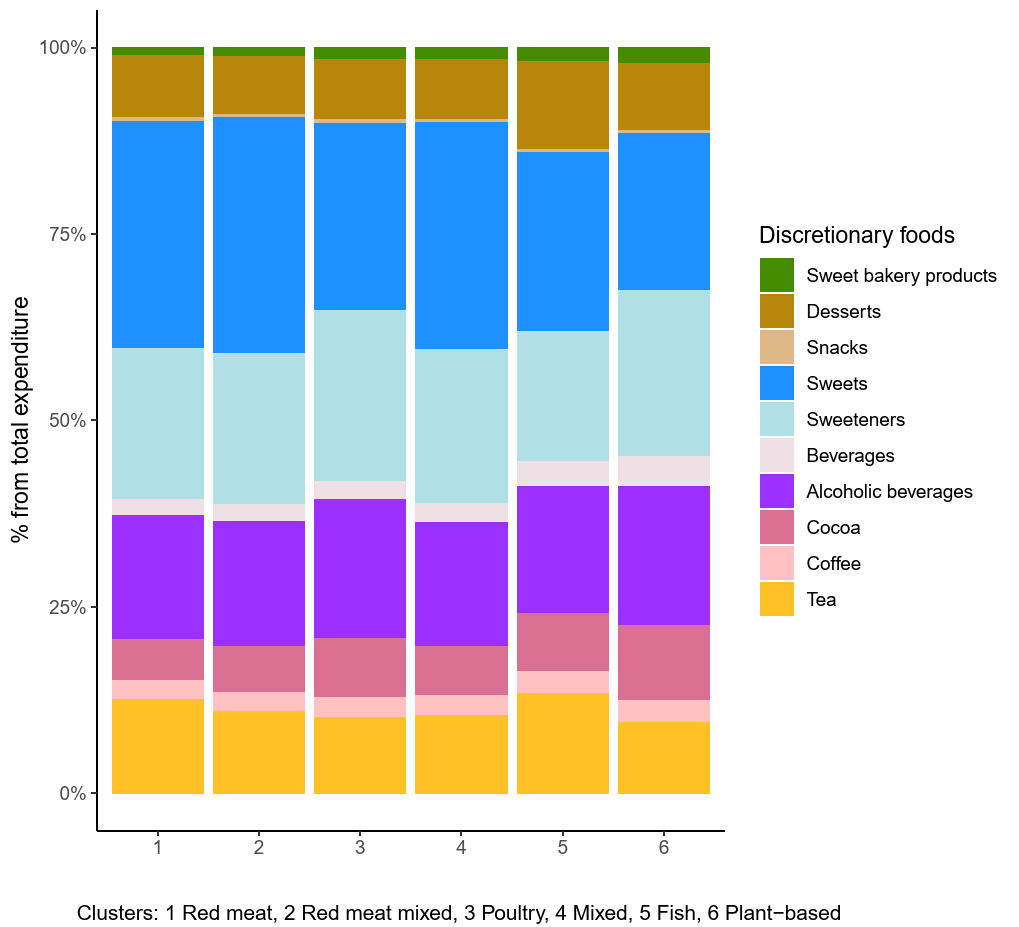


Supplementary Figure 1. Food group specific expenditure (% from total purchases scaled to 2500 kcal) within discretionary foods among 22,901 loyalty-card holders.


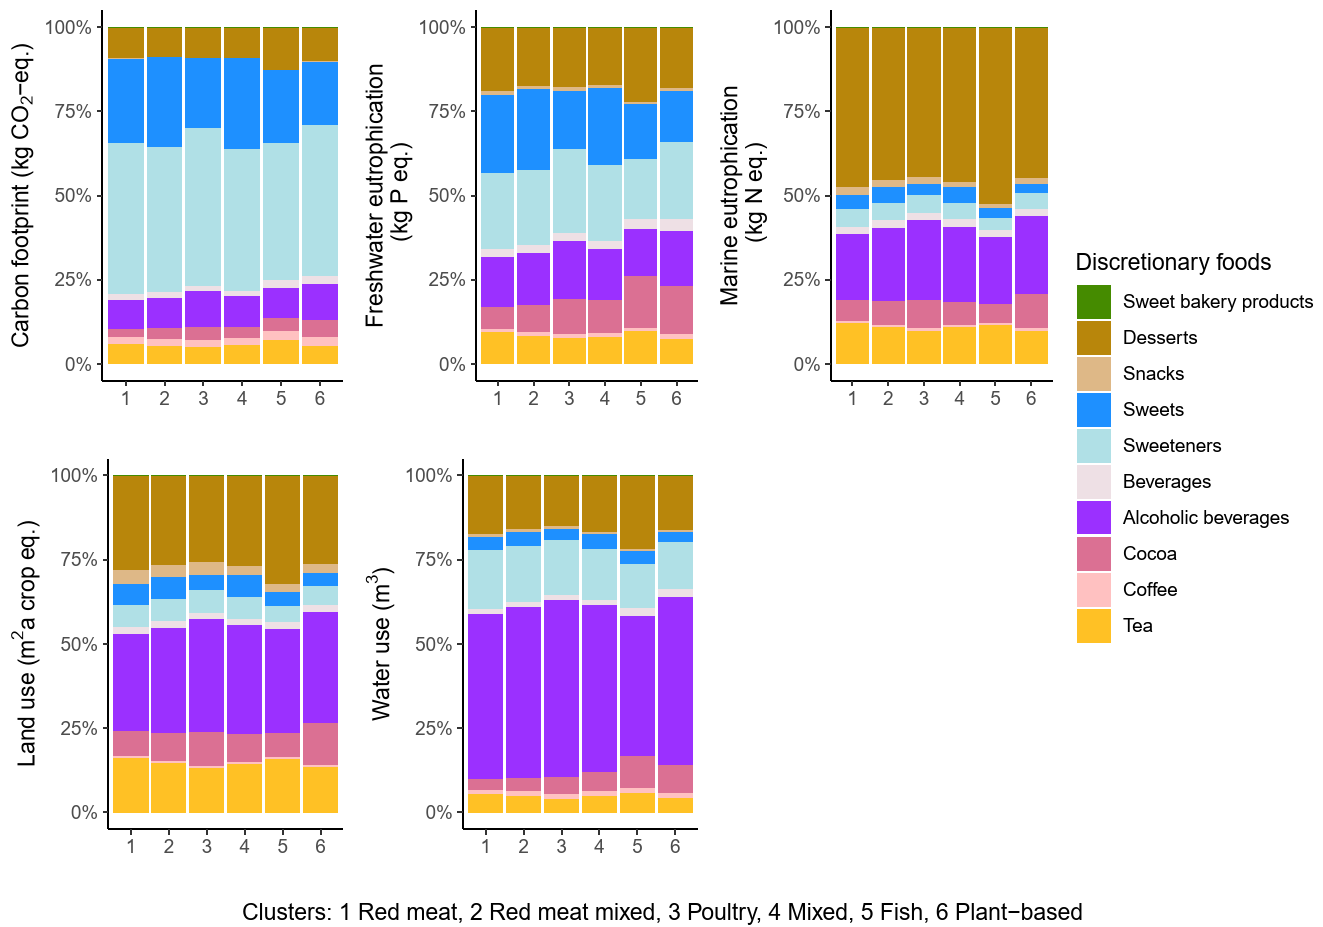


Supplementary Figure 2. Food group specific environmental impacts (% from total purchases scaled to 2500 kcal) within discretionary foods among 22,901 loyalty-card holders.


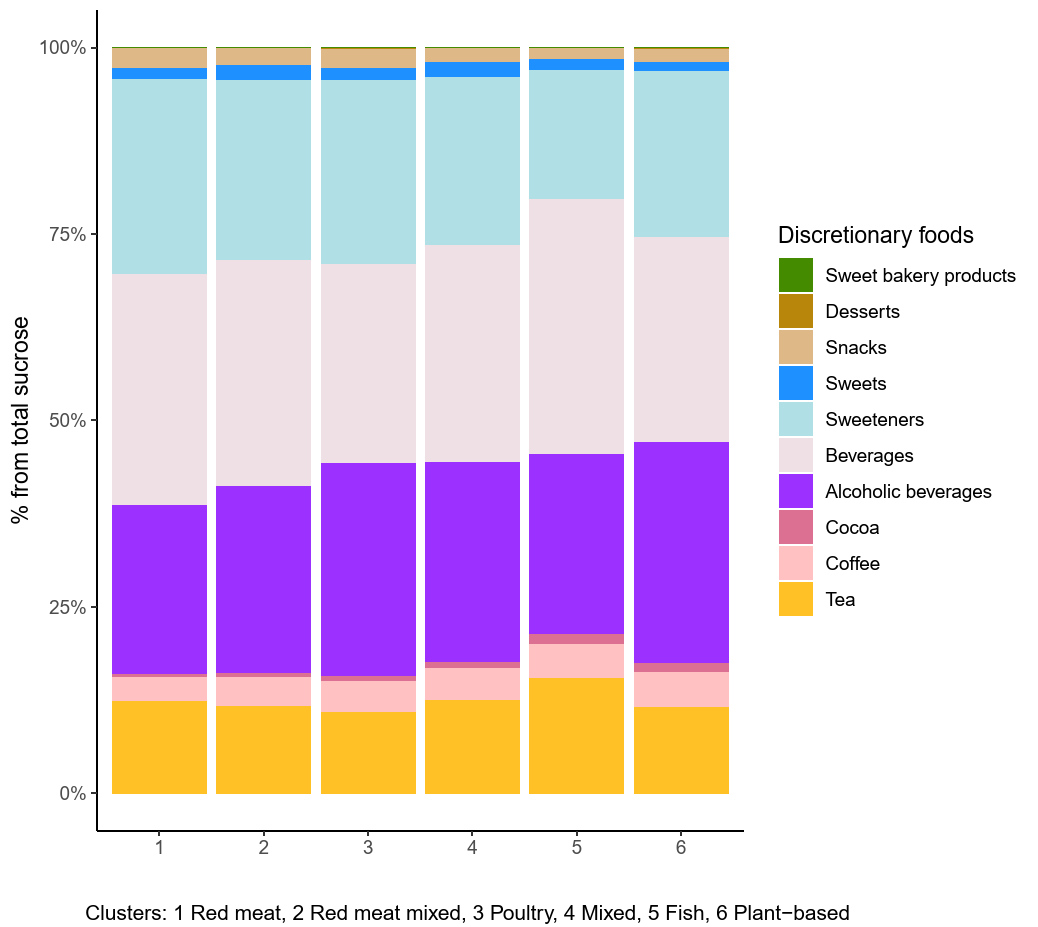


Supplementary Figure 3. Food group specific sucrose content (% from total purchases scaled to 2500 kcal) within discretionary foods among 22,901 loyalty-card holders.

| Supplementary table 1. Shares of freshwater eutrophication impact from captured, farmed and uncategorized fish purchases in the clusters. | | | |
| --- | --- | --- | --- |
|  | Captured fish | Farmed fish | Uncategorized fish* |
|  | % of kg P eq. from total | | |
| Cluster |  |  |  |
| Red meat | 11 | 54 | 34 |
| Red meat mixed | 9 | 54 | 38 |
| Red meat + poultry | 13 | 53 | 34 |
| Mixed | 2 | 13 | 85 |
| Fish | 7 | 55 | 38 |
| Plant-based | 15 | 49 | 35 |

*Fish products for which the species was unknown.

References:

Mazac R, Hyyrynen M, Kaartinen NE, Männistö S, Irz X, Hyytiäinen K, et al. Exploring tradeoffs among diet quality and environmental impacts in self-selected diets: a population-based study. Eur J Nutr. 2024 Aug;63(5):1663–78.
